# Genetic Regulation of Phenotypic Plasticity and Canalisation in Yeast Growth

Anupama Yadav<sup>1,\*</sup>, Kaustubh Dhole<sup>1</sup>, Himanshu Sinha<sup>1,2,3,\*</sup>

<sup>1</sup>Department of Biological Sciences, Tata Institute of Fundamental Research, Mumbai 400005, India

<sup>2</sup>Department of Biotechnology, Bhupat and Jyoti Mehta School of Biosciences, Indian Institute of Technology Madras, Chennai 600036, India

<sup>3</sup>Initiative for Biological Systems Engineering, Indian Institute of Technology Madras, Chennai 600036, India

**\*Authors for Correspondence:** Anupama Yadav, Department of Biological Sciences, Tata Institute of Fundamental Research, Mumbai 400005, India; Tel: +91-9869336415, Email: [anupama@tifr.res.in](mailto:anupama@tifr.res.in); and Himanshu Sinha, Department of Biotechnology, Bhupat and Jyoti Mehta School of Biosciences, Indian Institute of Technology Madras, Chennai 600036, India; Tel: +91-44-22574120, Email: [sinha@iitm.ac.in](mailto:sinha@iitm.ac.in)

**Short title:** Genetic Regulation of Phenotypic Plasticity

**Keywords:** phenotypic plasticity, canalisation, QTL mapping, reaction norm, environmental variance

## ABSTRACT

The ability of a genotype to show diverse phenotypes in different environments is called phenotypic plasticity. Phenotypic plasticity helps populations to evade extinctions in novel environments, facilitates adaptation and fuels evolution. However, most studies focus on understanding the genetic basis of phenotypic regulation in specific environments. As a result, while its evolutionary relevance is well established, genetic mechanisms regulating phenotypic plasticity and their overlap with the environment specific regulators is not well understood. *Saccharomyces cerevisiae* is highly sensitive to the environment, which acts as

31 not just external stimulus but also as signalling cue for this unicellular, sessile organism. We  
32 used a previously published dataset of a biparental yeast population grown in 34 diverse  
33 environments and mapped genetic loci regulating variation in phenotypic plasticity, plasticity  
34 QTL, and compared them with environment-specific QTL. Plasticity QTL is one whose one  
35 allele exhibits high plasticity whereas the other shows a relatively canalised behaviour. We  
36 mapped phenotypic plasticity using two parameters – environmental variance, an  
37 environmental order-independent parameter and reaction norm (slope), an environmental  
38 order-dependent parameter. Our results show a partial overlap between pleiotropic QTL and  
39 plasticity QTL such that while some plasticity QTL are also pleiotropic, others have a  
40 significant effect on phenotypic plasticity without being significant in any environment  
41 independently. Furthermore, while some plasticity QTL are revealed only in specific  
42 environmental orders, we identify large effect plasticity QTL, which are order-independent  
43 such that whatever the order of the environments, one allele is always plastic and the other is  
44 canalised. Finally, we show that the environments can be divided into two categories based  
45 on the phenotypic diversity of the population within them and the two categories have  
46 differential regulators of phenotypic plasticity. Our results highlight the importance of  
47 identifying genetic regulators of phenotypic plasticity to comprehensively understand the  
48 genotype-phenotype map.

49

## 50 **INTRODUCTION**

51 A single genotype cannot have high fitness in all conditions. Instead different genotypes  
52 show varying degrees of fitness in different environments, and therefore phenotype of a  
53 genotype is dependent on the environment. The ability of a single genotype to show different  
54 phenotypes in different environments is called phenotypic plasticity [1]. On the other hand,  
55 ability of a genotype to show the same phenotype independent of the environment is termed  
56 as canalisation [2]. Phenotypic plasticity facilitates adaptation to novel environments by  
57 allowing the population to exhibit a diverse range of phenotypes [3]. It is ubiquitous in nature  
58 and shown to be a major force in adaptation, be it adaptation to climate change, altitude,  
59 nutrition, multi-cellularity, etc. [4,5]. Consequently, phenotypic plasticity is one of the major  
60 drivers of evolution [2,6,7].

61 During adaptation, stabilising selection acts on the population such that the phenotype gets  
62 stabilised or canalised within an environment and across multiple environments [8]. One of

63 the ways, this canalisation is proposed to get perturbed is when this adapted population  
64 encounters a novel or rare environment. This perturbation of canalisation allows the  
65 population to exhibit a range of phenotypes thus facilitating adaptation. Canalisation and  
66 plasticity are dynamic, mutually dependent processes and a population switches between  
67 these two states depending on the environments encountered [9,10]. While a canalised  
68 phenotype would be beneficial in environments to which the population has adapted to, a  
69 plastic phenotype would be advantageous in a novel or rare environment [6]. Hence the same  
70 genotype is capable of showing a canalised or plastic behaviour depending on the  
71 environments considered and different genetic regulators may regulate phenotypic plasticity  
72 in varying environments.

73 While the importance of plasticity in adaptation and evolution has been established by  
74 multiple studies [11], these studies are mostly conducted in naturally occurring populations.  
75 Therefore, while evidence for phenotypic plasticity has been documented in multiple  
76 organisms across diverse phenotypes, its genetic regulation is not clearly understood.  
77 Additionally, most studies that attempt to understand the genetic regulation of a phenotype  
78 focus on either a single environment or multiple environments independently [12-14]. As a  
79 result, while our knowledge about genetic regulation of a phenotype in different  
80 environments is fairly comprehensive, we do not understand the genetic regulation of  
81 plasticity and canalisation across diverse environments. While phenotypic plasticity is mainly  
82 invoked to study the adaptability of natural populations, its ubiquity and role in evolution  
83 indicates that it should also be important for understanding the genetic architecture of  
84 complex traits [15].

85 Quantitative trait locus (QTL) mapping provides a good way to identify regulators of  
86 phenotypic plasticity. Phenotypes of most loci show environment dependence [16]. By this  
87 definition, all loci showing gene-environment interaction (GEI) exhibit phenotypic plasticity.  
88 However, a plasticity QTL is a locus whose one allele shows a canalised behaviour whereas  
89 the other allele shows phenotypic plasticity across diverse environments [17] (Fig 1A, 1B). If  
90 two genetically diverse strains have encountered and adapted to varied environments, or  
91 adapted to the same environments using different mechanisms, then crossing these strains  
92 will disrupt these mechanisms and allow identification of loci with differential plasticity in  
93 this biparental population.

94 While multiple studies have performed QTL mapping to identify plasticity QTL, they were  
95 either done across pairs of environments or continuums of environments [17,18]. However, in  
96 nature, populations encounter diverse environments, capable of affecting the phenotype,  
97 either simultaneously or consecutively. In-lab evolution studies have shown that the order of  
98 environments encountered during the course of evolution can dictate which alleles eventually  
99 get fixed in a population [19]. Parallel to this, it is probable that the order of encountering  
100 these environments would determine the plasticity of the genotype, which would in turn  
101 determine the selection forces that act on it (Fig 1). Different genotypes can show different  
102 ranges of phenotypic plasticity depending on the order of the environments and different  
103 parameters are required to capture the plasticity in different environmental groups (Fig 1C,  
104 1D). Hence in order to comprehensively identify the regulators of phenotypic plasticity, both  
105 diversity of environments and their order should be considered.

106 In this paper, we asked the following questions: can we identify plasticity QTL across a large  
107 number of heterogeneous environments? How do these plasticity QTL respond to different  
108 types and orders of environments? Finally, what is the association between pleiotropic  
109 regulators of the phenotype and plasticity regulators? Are loci that regulate plasticity and that  
110 are pleiotropic across multiple environments same such that all pleiotropic loci contribute to  
111 plasticity, or are these loci different and hence not identified in environment-specific QTL  
112 mapping?

113 *S. cerevisiae* provides an ideal system to identify the genetic regulators of phenotypic  
114 plasticity, since environment serves as both external stimulus as well as signalling cue for this  
115 unicellular, sessile, organism. Yeast growth is highly responsive to environments and has  
116 been shown to be differentially regulated in different environments [16,20,21]. In this study,  
117 using growth phenotype measured in 34 diverse environments for a large yeast biparental  
118 population [13], we measured phenotypic plasticity using two statistics: an environmental  
119 order-independent statistic – *Environmental variance* ( $Var_E$ ), and an environmental order-  
120 dependent statistic, *Sum of slopes* (reaction norms) ( $\sum Slope$ ) (Fig 1). Fig 1 shows that both  
121 these parameters capture different aspects of phenotypic plasticity. Fig 1A shows that  
122 genotypes with difference in phenotype across diverse environments do not necessarily have  
123 differential plasticity; 1B shows two genotypes with differential plasticity; and Fig 1C and  
124 1D show that while the environmental order has no bearing on environmental variance, the  
125 value of the reactions norms is highly sensitive to the order of the environments encountered.

126 We use these two parameters to identify loci with differential effects on phenotypic plasticity,  
127 plasticity QTL. To the best of our knowledge, our study is the first study to identify genetic  
128 regulation of phenotypic plasticity and canalisation across such a diverse set of environments.  
129 These genetic regulators of phenotypic plasticity may play an important role in explaining  
130 missing heritability and understanding the genetic regulation of complex traits especially  
131 human disease that are influenced by multiple environmental conditions.

132

## 133 **METHODS**

### 134 **Dataset**

135 The raw growth data used in this study was derived from a previously published study by  
136 Bloom et al. [13], in which the experimental procedures are described in detail. The data we  
137 used was generated for 1,008 segregants derived from a cross between yeast strains BY (a  
138 laboratory strain) and RM11-1a (a wine isolate, indicated as RM). These segregants were  
139 genotyped for a total of 11,623 polymorphic markers and were grown and phenotyped for  
140 colony size in 46 different conditions. Of these 46 conditions, we selected 34 conditions  
141 based on following three criteria: (i) segregant phenotype in a particular environment should  
142 show normal distribution; (ii) environments should be closer or mimic naturally occurring  
143 environmental conditions; (iii) since different degrees of environmental stresses can invoke  
144 correlated phenotypes, biasing our analysis, only heterogeneous environments were chosen.  
145 This filtering removed environments like high temperature growth (37°C), rapamycin, pH  
146 and temperature gradients, etc.

### 147 **Single QTL Mapping**

148 QTL mapping was carried out as described previously [21]. In brief, the R/qlt package  
149 [22,23] was used to identify QTL separately for colony size in each environment. QTL were  
150 identified using the LOD score, which is the  $\log_{10}$  of the ratio of the likelihood of the  
151 experimental hypothesis to the likelihood of the null hypothesis [23]. An interval mapping  
152 method ('scanone' function in R/qlt) was used to compute this LOD score using the Haley-  
153 Knott regression algorithm [22].

154 The following formula was used to calculate the F-score, which was further used to derive  
155 the LOD score. At a particular marker, let segregant  $i$ 's phenotypic value be  $y_{ij}$  where  $j$  can  
156 take two values ( $j = 1$ : BY allele and  $j = 2$ : RM allele).

$$157 \quad F = \frac{\sum_{j=1}^k n_i (\bar{y}_j - \bar{y})^2 / (k-1)}{\sum_{j=1}^k \sum_{i=1}^{n_j} (y_{ij} - \bar{y}_j)^2 / (N-k)}$$

158 here,  $N$  is the total number of segregants,  $n_1$  and  $n_2$  are the number of segregants having the  
159 BY and RM allele respectively ( $k = 2$ ) and  $y_i$  is the genotypic mean of allele  $j$ .

160 Let  $df$  denote the degrees of freedom ( $df = 1$  for a backcross and  $df = 2$  for an intercross). The  
161 LOD score is accordingly derived as follows:

$$162 \quad LOD = \frac{n}{2} \log_{10} \left[ F \left( \frac{df}{n - df - 1} \right) + 1 \right]$$

163 Under the null hypothesis, there is no significant difference in the means at the marker under  
164 consideration while under the alternative hypothesis, there is a presence of a QTL.

### 165 **Plasticity QTL Mapping**

166 Plasticity QTL mapping was performed using the same methodology as described for QTL  
167 mapping, using environmental variance and sum of slopes as phenotypes, instead of colony  
168 size.

169 Environmental variance ( $Var_E$ ) was computed for each segregant separately for high ( $Hv$ ) and  
170 low ( $Lv$ ) variance environments:

$$171 \quad Var_E = \frac{\sum_{i=1}^n (x_i - \mu)^2}{n-1}$$

172 where,  $x$  is phenotype of a segregant in an environment,  $\mu$  is the average phenotype across  $n$   
173 environments.  $n = 10$  for  $Hv$  and  $n = 24$  for  $Lv$  environments. For mapping in sub-groups of  
174  $Hv$  environments,  $n$  was 3 and 4, respectively.

175 Sum of slopes ( $\sum Slope$ ) was calculated for each segregant for each order of environments  
176 using the following formula:

$$177 \quad \sum Slope = \frac{\sum_{i=1}^n |x_i - x_{i-1}|}{c}$$

178 Where  $n$  is number of environments in a given order,  $x$  is the phenotype in the environment  
179 and  $c$  is the constant that represents difference between the two environments. Since all the  
180 environments are heterogeneous discrete environments and do not represent a continuum, the  
181 difference between them is always a constant, thus  $c$  was given a value of 1.

## 182 **Random orders and allele specific plasticity QTL**

183 Environmental order for calculating the sum of slopes was determined in two different ways:  
184 random orders, where for both  $Hv$  and  $Lv$  environments independently, 10 random orders of  
185 environments were generated. For a particular order, each environment was given a single  
186 unique position, such that there were no repetitions of environments. Sum of slopes was  
187 calculated for each segregant for each order and QTL mapping was done for each order  
188 separately. Allele specific orders separately for both BY and RM alleles and for both  $Hv$  and  
189  $Lv$  environments independently, the environments were ordered such that the mean of the  
190 segregants carrying a particular allele have the least possible sum of slopes. In other words,  
191 the mean of the population is canalised across the environmental order. Sum of slopes was  
192 calculated for this order for all segregants and QTL mapping was performed.

193

## 194 **RESULTS**

### 195 **Environments fall into two categories based on the variance of the segregants**

196 In the previously published dataset [13], we computed the variance of all segregants across  
197 34 environments to identify the range of phenotypic plasticity exhibited by the individuals of  
198 the population. A higher variance would indicate high diversity of the phenotype of the  
199 segregant across the environments (high phenotypic plasticity) whereas a low variance would  
200 suggest similar phenotype across all environments (canalisation). The phenotypic variance  
201 showed a normal distribution indicating that it was a complex trait with a fraction of  
202 individuals showing highly canalised and highly plastic behaviour (Fig 2A, S1A, S1B). There

203 was no association between the variance and average phenotype of the segregants ( $R^2 =$   
204 0.0007) indicating that segregants with both high and low average phenotype could show  
205 high variance.

206 Apart from the genotype, the environments considered also determine the plasticity of an  
207 individual. We have previously shown that while a population shows highly buffered  
208 phenotype in one environment, this buffering can be lost in others [24]. Hence, we compared  
209 the phenotypic variance of the segregants within each environment (Fig 2B). The variance in  
210 the 34 environments did not show either a normal or a bimodal distribution but a highly left  
211 skewed distribution with a median of 4.2 (Fig 2B). Hence we categorised the environments  
212 that were within the first quartile (0 to 8) in the category  $L_V$  environments. While the  
213 remaining 10 environments showed a large range of variance, splitting them into smaller  
214 number of environments could have reduced the statistical significance of the variance and  
215 slope phenotypes. Therefore, we categorised these 10 environments as  $H_V$  environments (Fig  
216 2B). We calculated variance of each segregant in  $L_V$  and  $H_V$  environments independently, and  
217 found no correlation between the two values (Fig 2C). This indicates that a segregant with  
218 highly variable phenotype in  $L_V$  environments can be either plastic or canalised in the  $H_V$   
219 environments and vice versa. We also calculated mean of segregants across  $H_V$  and  $L_V$   
220 environments, and found it to be poorly correlated ( $R^2 = 0.03$ , Fig S2A). Furthermore, if  
221 genetic regulation between random sets of  $L_V$  environments was as diverse as that between  
222  $H_V$  and  $L_V$  environments, then we should observe poor correlation among  $L_V$  environments.  
223 We sampled two random sets of 10 environments each from the  $L_V$  category and computed  
224 correlation of mean values of segregants. These two sets had non-overlapping environments  
225 such that the presence of common environments does not bias the correlation. We observed a  
226 significantly high correlation between mean across these two sets ( $R^2 = 0.38$ ,  $P < 0.01$ , Fig  
227 S2B), which indicated similar genetic regulation in  $L_V$  environments, but differential  
228 regulation across the  $H_V$  and  $L_V$  environments.

### 229 **Different loci are pleiotropic in high and low variance environments**

230 Studies have shown that while most yeast growth QTL tends to be environment specific,  
231 some loci have pleiotropic effects. A pleiotropic locus is one that has an effect on the  
232 phenotype across multiple environments. In order to determine whether plasticity QTL are  
233 the same as or a subset of or entirely different from pleiotropic QTL, we carried out QTL  
234 mapping in each environment (see Methods). A complete overlap of the large effect QTL and



235 a high overlap of small effect QTL was observed between this study and the original study by  
236 Bloom et al. [13] (S1 Table) reconfirming our mapping results. We first compared the  
237 pleiotropic loci identified in multiple environments. A locus was designated as pleiotropic if  
238 it has an effect in 4 or more environments with a LOD peak within 40kb interval in these  
239 environments. Multiple QTL were identified to be pleiotropic across the 34 environments  
240 (Table 1).

241 We next compared if the pleiotropic loci were different between the *Hv* and *Lv* environments.  
242 We found that some pleiotropic loci were common, but others were specific to only *Hv* or *Lv*  
243 environments (Fisher's Exact test  $P < 0.1$ , Table 1, S1 Table). This shows that there exists a  
244 difference in genetic regulation of the phenotype between the *Hv* and *Lv* environments, as  
245 predicted by poor correlation of mean across *Hv* and *Lv* environments but strong correlation  
246 among *Lv* environments (Fig S2). Previously done fine mapping studies done using the  
247 BYxRM segregant populations provide potential candidate genes in many of these loci.  
248 Previously, chrXIVb and chrXVa peaks have been identified in multiple environments and  
249 fine-mapped to pleiotropic genes like *MKT1* [12] and *IRA2* [12,25] respectively, however in  
250 this study neither of these were identified as plasticity QTL in either category of  
251 environments. Another pleiotropic QTL, chrXIII locus has been previously associated with  
252 yeast chronological lifespan and telomere length with gene *BUL2* as causative [26]. Finally,  
253 chrV QTL effected colony morphology with *GPA2* as causal gene [27]. While chrXIVa QTL  
254 has not been fine-mapped to any gene, various peaks identified in single QTL and plasticity  
255 QTL mapping (see below) indicated that causal gene could be *KRE33*, a protein required for  
256 biogenesis of small ribosomal subunit with its human homolog implicated in several types of  
257 cancer and premature ageing [28].

## 258 **Identifying plasticity QTL using environmental variance**

259 In order to identify plasticity QTL, the first step is to determine a parameter that captures  
260 plasticity of segregants. We used modifications of two commonly used parameters: variance  
261 and reaction norm or slope [17,29]. Commonly applied data normalisation across  
262 environments enhances the power of comparing effect of loci across two environments and  
263 helps identifying GEI. However, it also makes the allelic effects symmetric thereby making  
264 both alleles equally plastic which results in an inability to distinguish between plastic and  
265 canalised alleles (Fig 1A). Therefore, since the aim of this paper was to identify plasticity  
266 QTL and not GEI, we normalised the phenotype within an environment but not across

267 environments. While this reduced the power of identifying QTL, the ability to identify  
268 plasticity QTL was preserved. Whether one does across-environment normalisation or not,  
269 this has no bearing on the QTL identified within an environment [16].

270 Environmental variance ( $Var_E$ ) refers to the variance of the phenotype of a segregant across  
271 multiple environments. As discussed above, high variance would indicate that the segregant  
272 has diverse or plastic phenotype across environments and low variance would suggest that the  
273 segregant shows similar phenotype, or canalised behaviour, across environments. Since the  
274 scale of variance was different for  $Hv$  and  $Lv$  environments (Fig 2B),  $Var_E$  was calculated for  
275 each segregant independently for each class of environments. As a result, we got two  
276 phenotypes for each segregant:  $Var_E$  in  $Hv$  and  $Var_E$  in  $Lv$  environments. We observed no  
277 correlation between average phenotype and segregant  $Var_E$ , indicating that the two properties  
278 were not significantly related (Pearson correlation  $P > 0.1$ ). We then performed QTL  
279 mapping for these two phenotypes. While the overall LOD scores identified were lower than  
280 conventional single environment QTL mapping, the peaks were significant (Fig 3A, 3D, S2  
281 Table, permutation  $P < 0.01$ ). Two peaks were identified in  $Hv$  (Fig 3B, 3C) and one in  $Lv$   
282 environments (Fig 3E) with a LOD score  $> 2.0$  ( $P < 0.01$ ). The highest peak in  $Lv$   
283 environments, chrXIVa locus was pleiotropic and was unique to this class of environments  
284 (Table 1). One peak in  $Hv$  environments were pleiotropic (chrXIII locus) or whereas the other  
285 was not (chrV locus). Interestingly, for both the peaks in  $Hv$  environments, on chrV, chrXIII,  
286 the RM allele had higher environmental variance than BY allele; whereas for the one peak in  
287 chrXIVa locus in  $Lv$  environments, the BY allele showed higher environmental variance (Fig  
288 3, S2 Table). Surprisingly in single QTL mapping, BY allele of chrXIVa, which is the more  
289 plastic allele, had lower mean than the RM allele in almost all cases.

290 While the environments with variance greater than 8 were categorised as  $Hv$  environments, as  
291 the Fig 2B shows, the highest variable environments show large variance values and can  
292 possibly themselves be split further into two subgroups. Therefore, we split 7  $Hv$   
293 environments (variance greater than 20) into two subgroups -  $Hv\_subgroup1$  and  
294  $Hv\_subgroup2$  (S1 Table).  $Var_E$  was calculated for each segregant independently for each  
295 subgroups and QTL mapping was performed as previously discussed (Fig S3, S2 Table).  
296 While some loci vary between different subgroups, the large effect chrXIII locus, which was  
297 both pleiotropic and plastic in all  $Hv$  environments, was also identified in both the subgroups  
298 (Fig S3, S2 Table) supporting to the original categorisation of  $Hv$  and  $Lv$  environments.

299 Many loci that were pleiotropic across different environments were not identified as plasticity  
300 QTL. A stark example is the chrXIVb locus that has been identified as a pleiotropic locus in  
301 many environments but had no effect on phenotypic plasticity (Table 1).

### 302 **Identifying plasticity QTL using sum of slopes**

303 While  $Var_E$  provides an unbiased measure of phenotypic plasticity, it is not sensitive to  
304 relatively small changes in the phenotype (Fig 1D). As a result, most GEI studies calculate  
305 reaction norms or slopes to identify small effect but significant changes in the phenotype  
306 across environments. Usually GEI analysis is performed for a pair of environments [16,21].  
307 As shown by these studies, the steeper the slope of the reaction norm, the more plastic is the  
308 genotype. While sensitive, this method can be used only for 4-5 environments or continuums  
309 of environments. Large number of heterogeneous environments results in multiple pairwise  
310 comparisons that are difficult to both compute and compare. We overcame this shortcoming  
311 by computing a novel parameter called sum of slopes ( $\sum Slope$ , see Methods, Fig 1). Briefly,  
312 we arrange the environments in different orders and calculate slopes between consecutive  
313 environments. The sum of absolute values of these slopes, so that slopes in opposite direction  
314 do not cancel each other, gives the value of the parameter. Higher the sum of slope value,  
315 more plastic is the individual. Unlike  $Var_E$ , sum of slopes will depend upon the order of the  
316 environments considered (Fig 1C, 1D). We asked the following questions: how much overlap  
317 will be observed in the plasticity QTL mapped using these two different parameters? Will  
318 identification of plasticity QTL using sum of slopes depend on the order of the  
319 environments?

320 As done for  $Var_E$ , we calculated sum of slopes for each segregant separately for the  $Hv$  and  
321  $Lv$  environments. For each category, we used two different strategies to compute the order of  
322 the environments. First strategy was to generate random orders, where using permutations,  
323 we computed 10 random orders of the environments and then calculated sum of slopes for  
324 each segregant for an order and used this as a phenotype for mapping. As a result, we  
325 obtained plasticity QTL for each order of the environments, for both  $Hv$  and  $Lv$  environments  
326 separately (S3 Table, permutation  $P < 0.01$ ). Second strategy was to generate allele specific  
327 environmental orders, which takes into consideration that different alleles might have  
328 evolved as a result of different selection pressures and hence show canalisation across  
329 different orders of environments. While 10 combinations is a substantial number, it may not  
330 be exhaustive enough to identify canalisation orders for all alleles. Therefore, we ordered the

331 environments for each allele of each marker independently. For both  $Hv$  and  $Lv$  environments  
332 independently, for each locus, the environments were ordered to have the least possible sum  
333 of slopes for one allele. This order was then used to calculate sum of slopes for all segregants  
334 and the values were used for plasticity QTL mapping. The same was done for the other allele  
335 separately. Therefore, the total number of environmental orders tested was equal to the  
336 product of number of markers, two categories of environment and two alleles. Thus, the QTL  
337 were mapped for a canalised mean of each allele for each locus, in both categories of  
338 environments (Fig 4, S4 Table, permutation  $P < 0.01$ ).

339 Higher LOD scores and larger number of plasticity QTL were identified for sum of slopes  
340 than that were identified for environmental variance (Table 1, S2, S3 Table). For random  
341 order analyses, the plasticity QTL identified depended on the order of the environments. We  
342 compiled the results to identify peaks that were identified in most environmental orders.  
343 Certain plasticity QTL were identified in more than half of 10 random environmental orders,  
344 i.e. they were independent of the environmental order (Table 1). While 4 peaks were  
345 identified in majority of the environmental orders consisting of  $Lv$  environments, only a  
346 single peak was consistently identified in  $Hv$  environments (Table 1, S3 Table). These loci  
347 included the ones identified using  $Var_E$ , as well as unique to sum of slopes (Table 1). The loci  
348 were identified with higher LOD scores in the  $Lv$  than the  $Hv$  environments (S3 Table).

349 As noted in random order analyses, higher LOD scores and more peaks were identified using  
350 sum of slopes than  $Var_E$  (Fig 4). Distinct sets of peaks were identified in  $Hv$  and  $Lv$   
351 environments using allele specific environmental orders (S4 Table). Additionally, like the  
352 plasticity QTL identified depended on the random order, the identification of the plasticity  
353 QTL using allele specific order depended on the allele whose mean was canalised (Fig 4, S4  
354 Table). However, we also identified plasticity QTL that were independent of the allele whose  
355 mean effect was canalised, i.e. they were identified independent of whether the RM or BY  
356 allele was canalised. These overlapped with the plasticity QTL that were identified in most  
357 random orders of environments (Table 1).

358 We compared plasticity QTL identified using three strategies:  $Var_E$ , sum of slopes with  
359 random orders and sum of slopes with allele specific orders (Table 1). As proposed in Fig 1,  
360 both  $Var_E$  and sum of slopes are capable of identifying differences in plasticity to different  
361 extents and measuring both of them is required to identify the genetic regulators of  
362 phenotypic plasticity. While several QTL were specific to the parameter or environmental

363 order used, two loci chrXIII in *Hv* and chrXIVa in *Lv* environments were identified in all  
364 three methods (Table 1). Identification of these plasticity QTL through independent strategies  
365 emphasises their definite ability to regulate phenotypic plasticity.

366 Comparison of sum of slopes revealed that, as expected, the value of this parameter was less  
367 for *Lv* than for *Hv* environments. However, canalisation of mean of the allele, i.e. the lowest  
368 sum of slopes of mean, as done for allele specific order, did not necessarily result in reduced  
369 sum of slopes of the segregants carrying the allele (S4 Table). For plasticity QTL that were  
370 identified independent of the allele, the same allele had higher sum of slopes of segregants  
371 independent of the allele whose mean was canalised (S3, S4 Table). This explains why some  
372 plasticity QTL were identified irrespective of the environmental order. Furthermore, this  
373 shows that canalisation of the population mean does not always reflect canalisation of the  
374 individuals within the population (Fig 5A, 5B). An allele can have a canalised mean but  
375 differential plasticity of individuals. This was observed for both *Hv* and *Lv* environments (Fig  
376 5A, 5B). Furthermore, our results show that while environmental order can uncover the  
377 difference in plasticity between two alleles, a canalised allele will always be canalised  
378 independent of the environmental order (S4 Table).

379 High variance of sum of slopes within an allele would indicate diversity of phenotypic  
380 plasticity. While there was no association between mean and variance of segregant values  
381 across environments, we found that there was a positive association between the mean and  
382 variance of sum of slopes between various alleles in both *Hv* and *Lv* environments indicating  
383 that the allele with higher sum of slopes also showed more diversity (Fig 6). Therefore, the  
384 segregants carrying the more plastic allele did not show same pattern of phenotypic plasticity  
385 but demonstrated a diversity of patterns, potentially to facilitate adaptation to diverse  
386 environments. Hence, our results show that the more plastic allele also results in revelation of  
387 hidden reaction norms.

388

## 389 **DISCUSSION**

390 Our study identifies loci with differential effects on phenotypic plasticity in heterogeneous  
391 environments. We show that regulation of phenotypic plasticity is overlapping but different  
392 than the regulation of phenotypic variation in each environment. This has implications not  
393 only on adaptation and evolution, but also on understanding the genetic architecture of

394 genotype-phenotype map. While different plasticity QTL were identified using different  
395 parameters of plasticity and in different environmental orders, some of these plasticity QTL  
396 were identified in all mapping methods indicating their robust role in regulating phenotypic  
397 plasticity.

398 Phenotypic plasticity is a property of the genotype, unveiled by the environments. We show  
399 that environments can be divided into two categories based on phenotypic variance of the  
400 population and *Hv* and *Lv* environments (Fig 2). Such a distinction has been hypothesised by  
401 previous studies [4], which propose that when a population is adapted to a particular  
402 environment, then stabilising selection acts on the population, such that most individuals of  
403 the population show similar phenotype which is close to the fitness optimum (low variance).  
404 When the population encounters a novel or rare environment, this buffering is perturbed  
405 releasing high diversity of individual phenotypes (high variance), which can facilitate  
406 adaptation. In the light of this current evolutionary understanding of plasticity and  
407 canalisation, we infer our results from a biparental population as follows: the *Lv*  
408 environments are the ones in which either one or both strains have adapted to in the course of  
409 their evolutionary history whereas the *Hv* environments are potentially novel environments  
410 [30]. This conclusion is further facilitated by identification of different QTL as well plasticity  
411 QTL in both these categories of environments (Table 1). Differential enrichment of  
412 pleiotropic QTL indicates a common regulation of the phenotype in the canalised or *Lv*  
413 environments. Additionally, disruption of canalisation in the recombinant population may  
414 explain why the large effect and consistent plasticity QTL were identified in *Lv* than the *Hv*  
415 environments. Genetic recombination disrupts the evolved canalisation mechanisms therefore  
416 resulting in identification of plasticity QTL in *Lv* environments, whereas poor or no  
417 canalisation mechanisms exist for *Hv* environments, which results in high plasticity of all  
418 alleles. This results in reducing the LOD score of plasticity QTL identified.

419 As proposed in Fig 1, our results show that plasticity QTL are not same as pleiotropic QTL.  
420 Almost all loci show GEI and large effect pleiotropic loci show large effect GEI [16].  
421 However, we observed only a partial overlap between pleiotropic QTL and plasticity QTL.  
422 While some large effect QTL (like chrXIII and chrXIVa) also had pleiotropic effects, others  
423 like chrV and chrXIVc did not show pleiotropy but were equally significant plasticity QTL.  
424 In fact, while chrXIVa and chrXIVc were in a relative close physical distance, within 160kb  
425 (Table 1), they had opposite effects on plasticity of the alleles: BY allele of chrXIVa showed  
426 high plasticity and RM allele of chrXIVc showed high plasticity (S3, S4 Table). This

427 indicates that genetic regulation of phenotypic plasticity is overlapping, but different than  
428 genetic regulation within each environment. This further emphasises that in order to  
429 understand the genotype-phenotype map and the function of identified molecular regulatory  
430 hubs, it is important to not only understand their effects in one environment or phenotypes  
431 but across different environments.

432 In a previous study, we showed the biological implication of mean and variance of a  
433 population [24]. We showed that higher variance was associated with phenotypic  
434 manifestation of cryptic or hidden variants. Additionally, a high phenotypic variance could  
435 either be associated with a higher or a lower phenotypic mean depending on the environment.  
436 Here we show a strong correlation between mean and variance of phenotypic plasticity (Fig  
437 6). Interestingly, in both  $H_V$  and  $L_V$  environments, the allele with a higher mean of plasticity  
438 also had a higher variance (Fig 6). This indicates that segregants containing the more plastic  
439 alleles exhibit a diverse range of phenotypic plasticity, potentially to facilitate adaptation in  
440 diverse environmental conditions. The high variance of plasticity values (both  $Var_E$  and sum  
441 of slopes) suggests epistasis resulting in revelation of hidden reaction norms [4] or cryptic  
442 genetic variants with diverse effects across environments. Along with shedding light on  
443 mechanisms of regulation of phenotypic plasticity, this suggests an association between  
444 genetic regulation of cryptic genetic variation and phenotypic plasticity [31].

445 In conclusion, by identifying genetic regulators of phenotypic plasticity and canalisation, our  
446 results highlight that genetic regulation of a phenotype in an environment may depend not  
447 only upon mechanisms directly evolved in that environment but maybe a result of evolution  
448 in a diverse range of environments [15,32]. While commenting on the evolutionary nature of  
449 the identified plasticity QTL is beyond the scope of our results, our study opens new avenues  
450 of exploring population genetic data and understanding the underlying basis of the genetic  
451 architecture. Differential regulation of phenotypic plasticity provides a potential reason  
452 underlying the high interconnectivity observed in the genotype-phenotype map. This  
453 interconnectivity could be an outcome of cross talk between different genetic modules that  
454 either maintain canalisation or induce plasticity across different environments and  
455 phenotypes. This has profound implications, especially on understanding adaptation  
456 mechanisms in naturally occurring plant and animal populations, development [33] as well as  
457 understanding the molecular basis of regulation of complex human diseases highly  
458 susceptible to environmental conditions [34] such as metabolic and psychological disorders.

459 **Table 1: Comparison of QTL and plasticity QTL**

| Locus                       | Characteristics                                                                       | Single QTL $H_v$ (no. of environments) | Single QTL $L_v$ (no. of environments) | Environmental Variance $H_v$ | Allele Specific $H_v$ | Random Order $H_v$ | Environmental Variance $L_v$ | Allele Specific $L_v$    | Random Order $L_v$ |
|-----------------------------|---------------------------------------------------------------------------------------|----------------------------------------|----------------------------------------|------------------------------|-----------------------|--------------------|------------------------------|--------------------------|--------------------|
| chrXV (170kb)<br>(chrXVa)   | <b>Pleiotropic</b> in both $H_v$ and $L_v$ environments; not a plasticity QTL         | 7/10                                   | 19/24                                  | -                            | -                     | -                  | -                            | -                        | -                  |
| chrXIV (470kb)<br>(chrXIVb) | <b>Pleiotropic</b> in both $H_v$ and $L_v$ environments; not a plasticity QTL         | 6/10                                   | 18/24                                  | -                            | -                     | -                  | -                            | -                        | -                  |
| chrXIV (370kb)<br>(chrXIVa) | <b>Pleiotropic</b> in $L_v$ environments; <b>plasticity QTL</b> in $L_v$ environments | 1/10                                   | 18/24                                  | -                            | -                     | -                  | LOD 2.74                     | LOD 19.9 (BY); 13.2 (RM) | 10/10 orders       |
| chrXV (590kb)<br>(chrXVb)   | <b>Pleiotropic</b> in $L_v$ environments; <b>plasticity QTL</b> in $L_v$ environments | 1/10                                   | 10/24                                  | -                            | -                     | -                  | -                            | LOD NA (BY); 15.02 (RM)  | 6/10 orders        |
| chrXIV 530kb<br>(chrXIVc)   | Not pleiotropic; <b>plasticity QTL</b> in $L_v$ environments                          | -                                      | -                                      | -                            | -                     | -                  | -                            | LOD 10.92 (BY); 12.05    | 10/10 orders       |



|                   |                                                                                                        |      |      |          |                                      |                |   |      |   |
|-------------------|--------------------------------------------------------------------------------------------------------|------|------|----------|--------------------------------------|----------------|---|------|---|
|                   |                                                                                                        |      |      |          |                                      |                |   | (RM) |   |
| chrV<br>(210kb)   | Not pleiotropic;<br><b>plasticity QTL</b> in<br><i>Hv</i> environments                                 | -    | -    | LOD 2.34 | LOD<br>8.07<br>(BY);<br>NA<br>(RM)   | 5/10<br>orders | - | -    | - |
| chrXIII<br>(50kb) | <b>Pleiotropic</b> in <i>Hv</i><br>environments;<br><b>plasticity QTL</b> in<br><i>Hv</i> environments | 5/10 | 5/24 | LOD 2.7  | LOD<br>5.54<br>(BY);<br>5.71<br>(RM) | 7/10<br>orders | - | -    | - |

460

461 **REFERENCES**

- 462 1. Wu R. The detection of plasticity genes in heterogeneous environments. *Evolution*.  
463 1998;52: 967–977. doi: 10.2307/2411229
- 464 2. Agrawal AA. Phenotypic plasticity in the interactions and evolution of species.  
465 *Science*. 2001;294: 321–326. doi: 10.1126/science.1060701
- 466 3. Auld JR, Agrawal AA, Relyea RA. Re-evaluating the costs and limits of adaptive  
467 phenotypic plasticity. *Proc Biol Sci*. 2009. doi: 10.1098/rspb.2009.1355
- 468 4. Schlichting CD. Hidden reaction norms, cryptic genetic variation, and evolvability.  
469 *Ann N Y Acad Sci*. 2008;1133: 187–203. doi: 10.1196/annals.1438.010
- 470 5. Vedder O, Bouwhuis S, Ben C Sheldon. Quantitative assessment of the importance of  
471 phenotypic plasticity in adaptation to climate change in wild bird populations. *PLoS*  
472 *Biol*. 2013;11: e1001605. doi: 10.1371/journal.pbio.1001605
- 473 6. Kitano H. Biological robustness. *Nat Rev Genet*. 2004;5: 826–837. doi:  
474 10.1038/nrg1471
- 475 7. Crispo E. The Baldwin Effect and genetic assimilation: revisiting two mechanisms of  
476 evolutionary change mediated by phenotypic plasticity. *Evolution*. 2007;61: 2469–  
477 2479. doi: 10.1111/j.1558-5646.2007.00203.x
- 478 8. Flatt T. The evolutionary genetics of canalization. *Q Rev Biol*. 2005;80: 287–316. doi:  
479 10.1086/432265
- 480 9. Stearns SC, Kawecki TJ. Fitness sensitivity and the canalization of life-history traits.  
481 *Evolution*. 1994;48: 1438–1450. doi: 10.2307/2410238
- 482 10. Debat V, David P. Mapping phenotypes: canalization, plasticity and developmental  
483 stability. *Trends Ecol Evol*. 2001;16: 555–561. doi: 10.1016/S0169-5347(01)02266-2
- 484 11. Nussey DH, Postma E, Gienapp P, Visser ME. Selection on heritable phenotypic  
485 plasticity in a wild bird population. *Science*. 2005;310: 304–306. doi:  
486 10.1126/science.1117004

- 487 12. Perlstein EO, Ruderfer DM, Roberts DC, Schreiber SL, Kruglyak L. Genetic basis of  
488 individual differences in the response to small-molecule drugs in yeast. *Nat Genet.*  
489 2007;39: 496–502. doi: 10.1038/ng1991
- 490 13. Bloom JS, Ehrenreich IM, Loo WT, Lite T-LV, Kruglyak L. Finding the sources of  
491 missing heritability in a yeast cross. *Nature.* 2013;494: 234–237. doi:  
492 10.1038/nature11867
- 493 14. Bloom JS, Kotenko I, Sadhu MJ, Treusch S, Albert FW, Kruglyak L. Genetic  
494 interactions contribute less than additive effects to quantitative trait variation in yeast.  
495 *Nat Comm.* 2015;6: 8712. doi: 10.1038/ncomms9712
- 496 15. Forsman A. Rethinking phenotypic plasticity and its consequences for individuals,  
497 populations and species. *Heredity.* 2015;115: 276–284. doi: 10.1038/hdy.2014.92
- 498 16. Yadav A, Radhakrishnan A, Bhanot G, Sinha H. Differential regulation of antagonistic  
499 pleiotropy in synthetic and natural populations suggests its role in adaptation. *G3*  
500 (Bethesda). 2015;5: 699–709. doi: 10.1534/g3.115.017020
- 501 17. Lacaze X, Hayes PM, Korol A. Genetics of phenotypic plasticity: QTL analysis in  
502 barley, *Hordeum vulgare*. *Heredity.* 2009;102: 163–173. doi: 10.1038/hdy.2008.76
- 503 18. Gutteling EW, Riksen JAG, Bakker J, Kammenga JE. Mapping phenotypic plasticity  
504 and genotype-environment interactions affecting life-history traits in *Caenorhabditis*  
505 *elegans*. *Heredity.* 2007;98: 28–37. doi: 10.1038/sj.hdy.6800894
- 506 19. Cooper TF, Lenski RE. Experimental evolution with *E. coli* in diverse resource  
507 environments. I. Fluctuating environments promote divergence of replicate populations.  
508 *BMC Evol Biol.* 2010;10: 1. doi: 10.1186/1471-2148-10-11
- 509 20. Cubillos FA, Billi E, Zörgö E, Parts L, Fargier P, Omholt S, et al. Assessing the  
510 complex architecture of polygenic traits in diverged yeast populations. *Mol Ecol.*  
511 2011;20: 1401–1413. doi: 10.1111/j.1365-294X.2011.05005.x
- 512 21. Bhatia A, Yadav A, Gagneur J, Zhu C, Steinmetz LM, Bhanot G, et al. Yeast growth  
513 plasticity is regulated by environment-specific multi-QTL interactions. *G3 (Bethesda).*  
514 2014;4: 769–777. doi: 10.1534/g3.113.009142

- 515 22. Broman KW, Wu H, Sen S, Churchill GA. R/qtl: QTL mapping in experimental  
516 crosses. *Bioinformatics*. 2003;19: 889–890. doi: 10.1093/bioinformatics/btg112
- 517 23. Broman KW, Sen S. *A Guide to QTL Mapping with R/qtl*. New York: Springer; 2009.  
518 pp. 1–412. doi: 10.1007/978-0-387-92125-9
- 519 24. Yadav A, Dhole K, Sinha H. Unraveling the genetic architecture of cryptic genetic  
520 variation. *bioRxiv*. 2015. doi: 10.1101/033621
- 521 25. Smith E, Kruglyak L. Gene-environment interaction in yeast gene expression. *PLoS*  
522 *Biol*. 2008;6: e83. doi: 10.1371/journal.pbio.0060083
- 523 26. Kwan EX, Foss E, Kruglyak L, Bedalov A. Natural polymorphism in BUL2 links  
524 cellular amino acid availability with chronological aging and telomere maintenance in  
525 yeast. *PLoS Genet*. 2011;7: e1002250. doi: 10.1371/journal.pgen.1002250
- 526 27. Taylor MB, Phan J, Lee JT, McCadden M, Ehrenreich IM. Diverse genetic  
527 architectures lead to the same cryptic phenotype in a yeast cross. *Nat Comm*. 2016;7:  
528 11669. doi: 10.1038/ncomms11669
- 529 28. Li Z, Lee I, Moradi E, Hung N-J, Johnson AW, Marcotte EM. Rational extension of the  
530 ribosome biogenesis pathway using network-guided genetics. *PLoS Biol*. 2009;7:  
531 e1000213. doi: 10.1371/journal.pbio.1000213
- 532 29. Pigliucci M. Evolution of phenotypic plasticity: where are we going now? *Trends Ecol*  
533 *Evol* 2005;20: 481–486. doi: 10.1016/j.tree.2005.06.001
- 534 30. Crispo E. Modifying effects of phenotypic plasticity on interactions among natural  
535 selection, adaptation and gene flow. *J Evol Biol*. 2008;21: 1460–1469. doi:  
536 10.1111/j.1420-9101.2008.01592.x
- 537 31. Sangster TA, Queitsch C. The HSP90 chaperone complex, an emerging force in plant  
538 development and phenotypic plasticity. *Curr Opin Plant Biol*. 2005;8: 86–92. doi:  
539 10.1016/j.pbi.2004.11.012
- 540 32. Korte A, Farlow A. The advantages and limitations of trait analysis with GWAS: a  
541 review. *Plant Methods* 2013 9:1. doi: 10.1186/1746-4811-9-29

- 542 33. Monaghan P. Early growth conditions, phenotypic development and environmental  
543 change. *Philos Trans R Soc Lond B Biol Sci.* 2008;363: 1635–1645. doi:  
544 10.1098/rstb.2007.0011
- 545 34. Swynghedauw B. Phenotypic plasticity of adult myocardium: molecular mechanisms. *J*  
546 *Exp Biol.* 2006;209: 2320–2327. doi: 10.1242/jeb.02084
- 547
- 548

## 549 FIGURE LEGENDS

550 **Fig 1: Schematic showing dependence of phenotypic plasticity parameters on the order**  
551 **of the environments.** Genotype A1 and A2 are represented in blue and red colours  
552 respectively.  $Var_E$  refers to environmental variance whereas  $\sum Slope$  refers to sum of slopes,  
553 as described in Methods. y-axis denotes the phenotype and x-axis denotes discrete  
554 environments arranged in different orders. (A) Genotype A1 and A2 have significant  
555 differences in multiple environments but are both equally plastic. (B) A1 is plastic and A2 is  
556 canalised. (C) and (D) shows the same environments arranged in different orders which have  
557 no effect on environmental variance but have different impact on reaction norms or sum of  
558 slopes.

559 **Fig 2: Categorisation of environments based on phenotypic variance.** (A) Phenotypic  
560 variance of ~1000 segregants (x-axis) across different environments (y-axis). (B) Phenotypic  
561 variance of ~1000 segregants (y-axis) within each environment (x-axis). Green colour refers  
562 to environments with low phenotypic variance ( $L_v$ ) and pink refers to environments with high  
563 phenotypic variance ( $H_v$ ). The dashed line indicates the median of the distribution. (C)  
564 Comparison of phenotypic variance of ~1000 segregants between  $H_v$  (y-axis) and  $L_v$  (x-axis)  
565 environments. A low regression coefficient indicates poor correlation between the two.

566 **Fig 3: QTL mapping of environmental variance in  $H_v$  and  $L_v$  environments.** (A) LOD  
567 score distribution plot of environmental variance across  $H_v$  environments. The dashed line  
568 represent the LOD cut off of 2.0, permutation  $P < 0.01$  (B) Dot plot of marker at chrV  
569 (201,987). (C) Dot plot of marker at chrXIII (46,211). (D) LOD score distribution plot of  
570 environmental variance across  $L_v$  environments. The dashed line represent the LOD cut off  
571 of 2.0, permutation  $P < 0.01$  (E) Dot plot of marker at chrXIV (374,661). Red and blue  
572 colours denote BY and RM alleles respectively.

573 **Fig 4: QTL mapping of reaction norms in  $H_v$  and  $L_v$  environments using allele specific**  
574 **orders.** (A) and (B) show LOD score distribution plots of reaction norms using allele specific  
575 order across  $H_v$  environments. The dashed line represent the LOD cut off of 4.0 in A and B  
576 respectively, permutation  $P < 0.01$ . (C) and (D) show LOD score distribution plots of  
577 reaction norms using allele specific order across  $L_v$  environments. The dashed line represent  
578 the LOD cut off of 5.0 in C and D respectively, permutation  $P < 0.01$ . Red and blue plots  
579 indicated QTL mapping performed by canalising BY and RM alleles, respectively.

580 **Fig 5: Phenotypic plasticity observed within canalised mean effects.** Reaction norms of  
581 segregants carrying RM allele of marker chrXIII (45,801) in *Hv* environments (A), and BY  
582 allele of marker chrXIV (364,968) in *Lv* environments (B). In both the plots, the  
583 environments are arranged such that the mean phenotype, denoted by the black line, has the  
584 least possible value of sum of slopes. Reaction norms for 10 random segregants have been  
585 highlighted as blue, RM, and red, BY in the two plots and reaction norms of other segregants  
586 are represented in grey lines.

587 **Fig 6: Comparison of mean and variance of allelic reaction norms.** Comparison of  
588 difference in mean and variance of the alleles of peaks identified in 10 different random  
589 orders in *Hv* (A) and *Lv* (B) environments. x-axis shows the difference between mean value  
590 of sum of slopes of alleles for different peaks, BY-RM, and y-axis refers to difference  
591 between variance of sum of slopes of alleles, BY-RM. See S3 Table for more details.

#### 592 SUPPLEMENTARY TABLE LEGENDS

593 **S1 Table: Comparison of QTL identified in each environment independently**

594 **S2 Table: Plasticity QTL identified using environmental variance ( $Var_E$ ) in *Hv* and *Lv***  
595 **environments**

596 **S3 Table: Plasticity QTL identified using sum of slopes in 10 randomly generated**  
597 **orders of environment in *Hv* and *Lv* environments**

598 **S4 Table: Plasticity QTL identified using sum of slopes in allele specific orders of**  
599 **environment in *Hv* and *Lv* environments**

#### 600 SUPPLEMENTARY FIGURE LEGENDS

601 **Figure S1: Normal distribution of environmental variance ( $Var_E$ ) phenotype.** (A)  
602 Histogram showing the normal distribution of environmental variance across all  
603 environments. x-axis shows classes of variance with an interval size of  $Var_E = 1.0$  and y-axis  
604 shows the number of segregants showing a particular variance value. (B) QQ plot comparing  
605 the observed variance of segregants with the expected variance, given the distribution in  
606 normal. x-axis shows the expected value of a distribution of 1007 individuals with a mean of  
607 9.48 and standard deviation of 3.46 (as observed in the current distribution) and y-axis shows  
608 the observed values of the segregants. (C) Histogram showing the normal distribution of  
609 environmental variance across *Lv* environments. x-axis shows classes of variance with an

610 interval size of  $Var_E$  ranging from 0.25 to 0.5, and y-axis shows the number of segregants  
611 showing a particular variance value. (D) Histogram showing the normal distribution of  
612 environmental variance across  $Hv$  environments. x-axis shows classes of variance with an  
613 interval size of  $Var_E = 2.0$  and y-axis shows the number of segregants showing a particular  
614 variance value.

615 **Figure S2: Comparison of mean of segregants across different groups of environments.**

616 (A) Comparison of mean values of all segregants across 24  $Hv$  environments (x-axis) with  
617 that across  $Lv$  environments (y-axis). (B) Comparison of mean values of all segregants across  
618 two mutually exclusive sets of 10 environments each, chosen from the 24  $Lv$  environments,  
619 set 1 (x-axis) and set 2 (y-axis).

620 **Figure S3: LOD score distribution plot of environmental variance in  $Hv\_subgroup1$  and**

621  **$Hv\_subgroup2$ .** The dashed line represent the LOD cut off of 1.0, permutation  $P < 0.05$ .

622



**Figure 1**

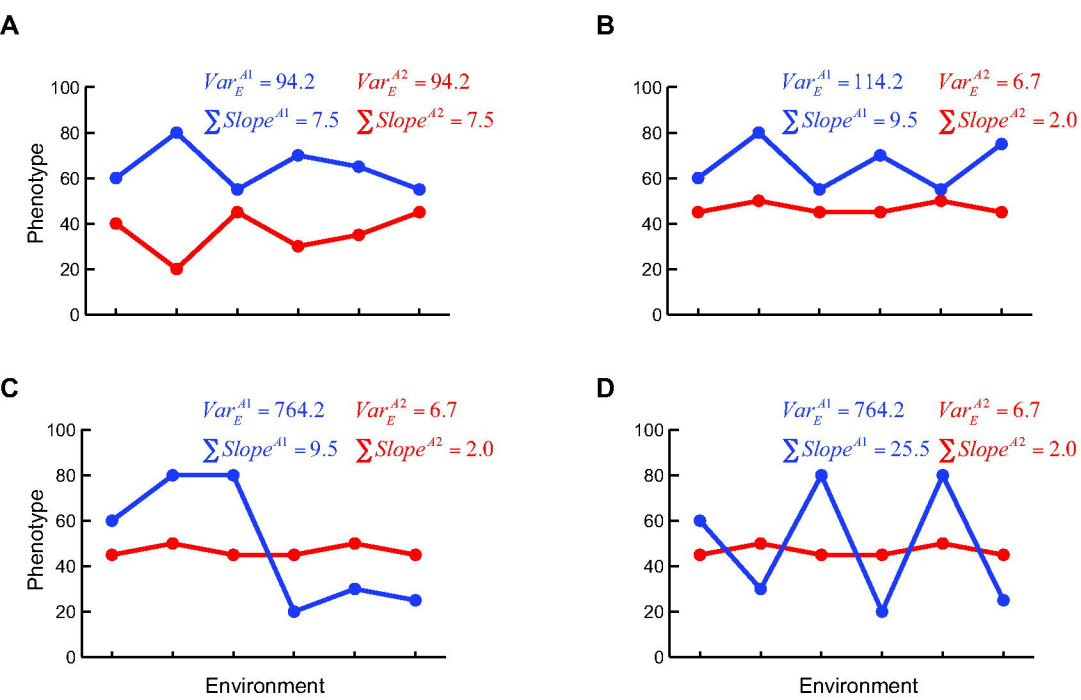

**Figure 2**

**A**

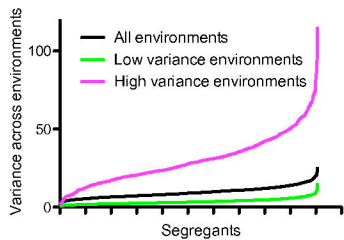

**B**

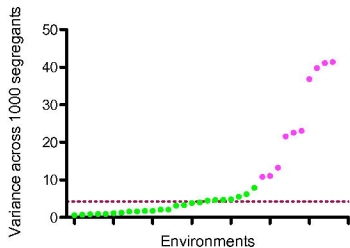

**C**

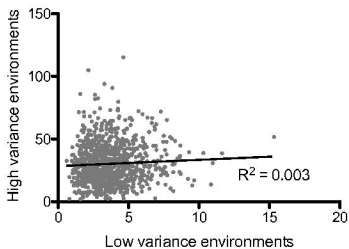

Figure 3

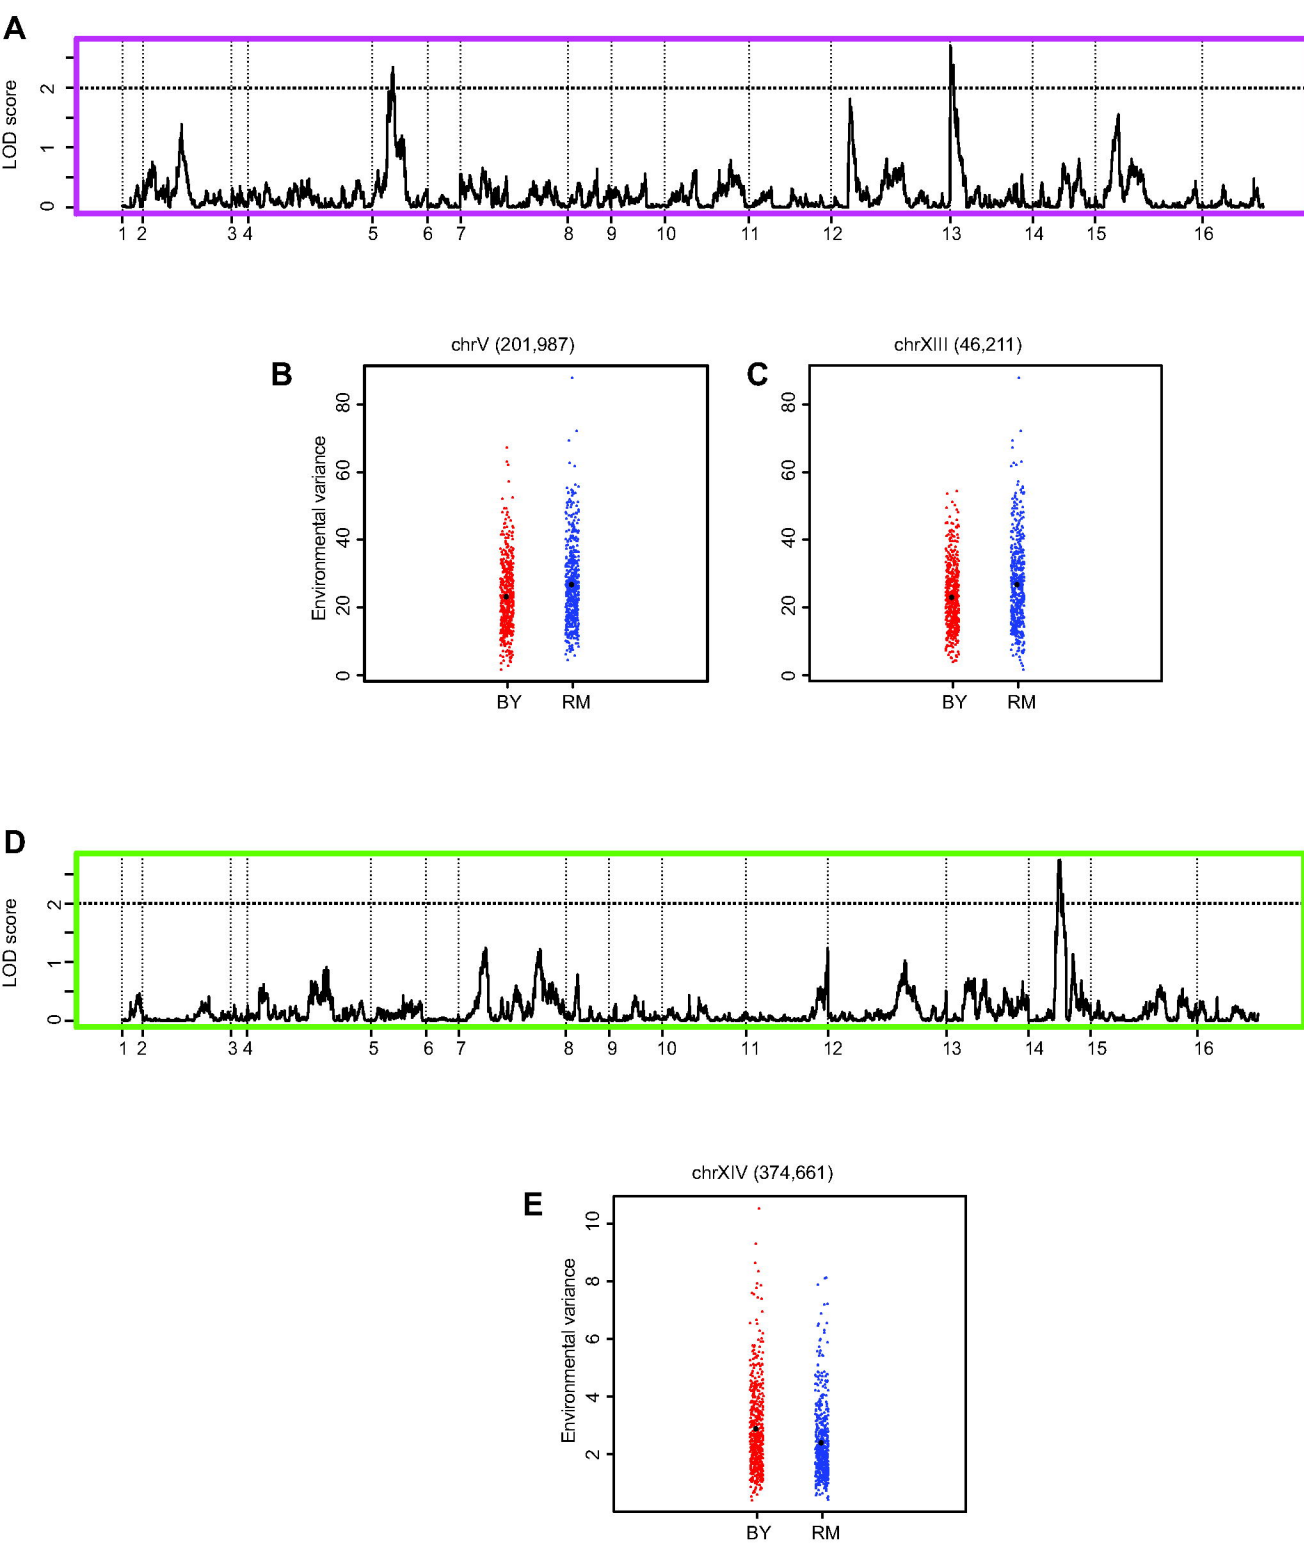

Figure 4

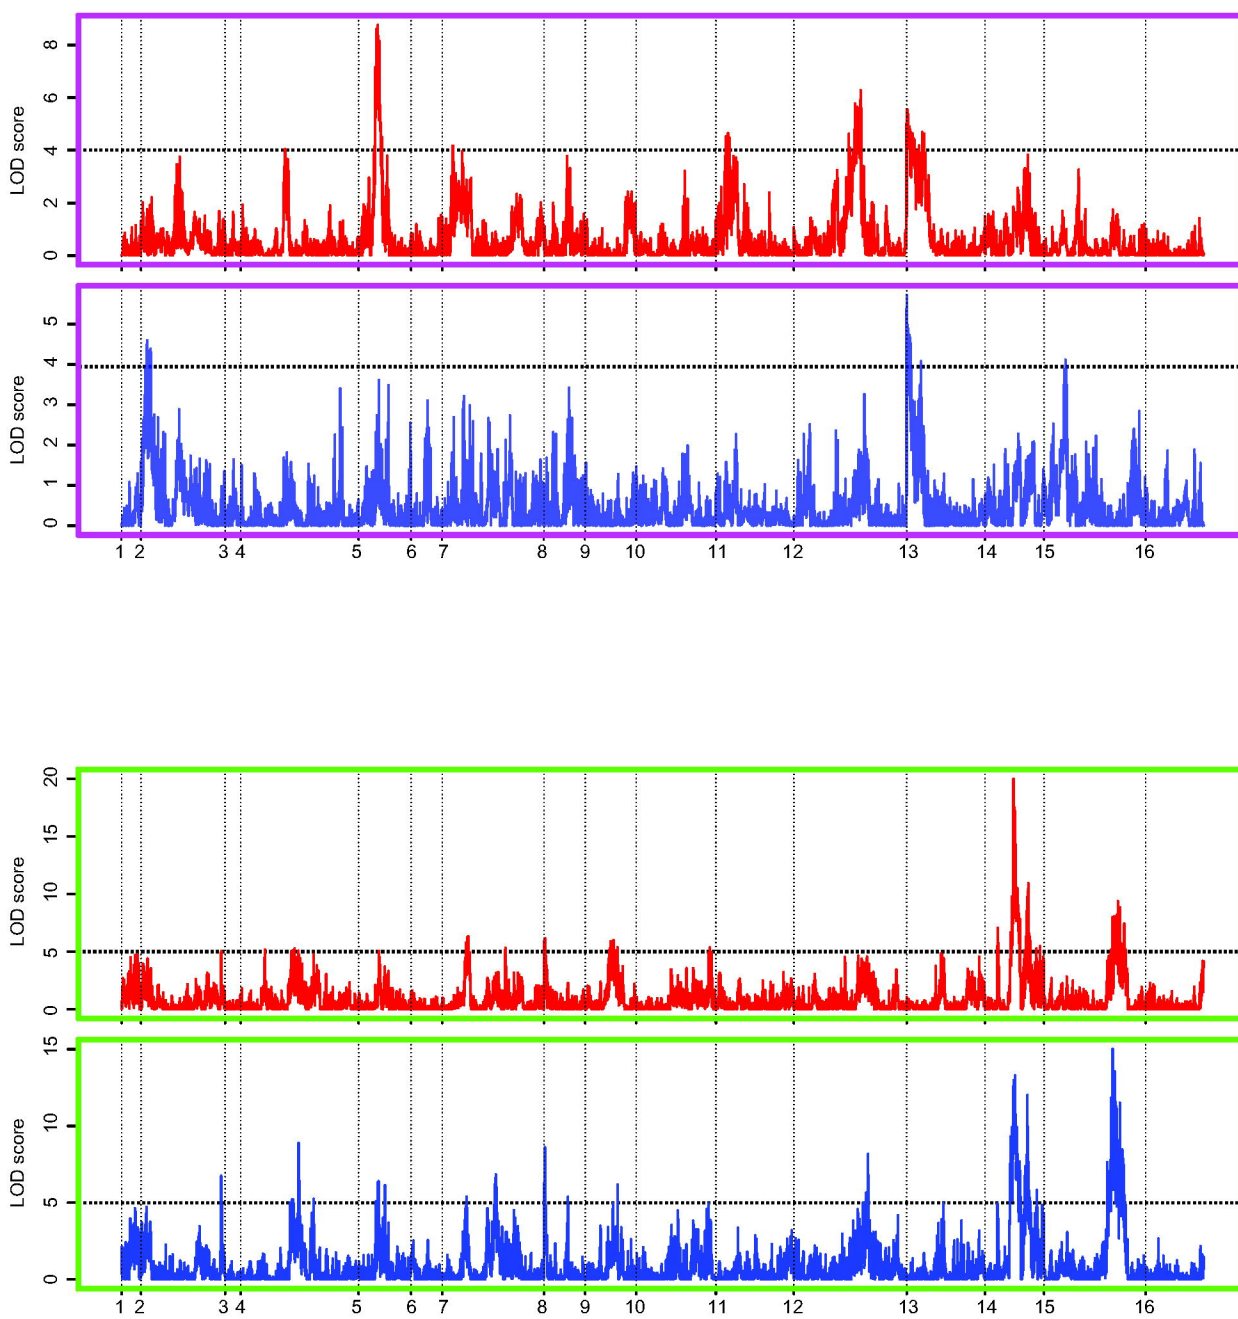

Figure 5

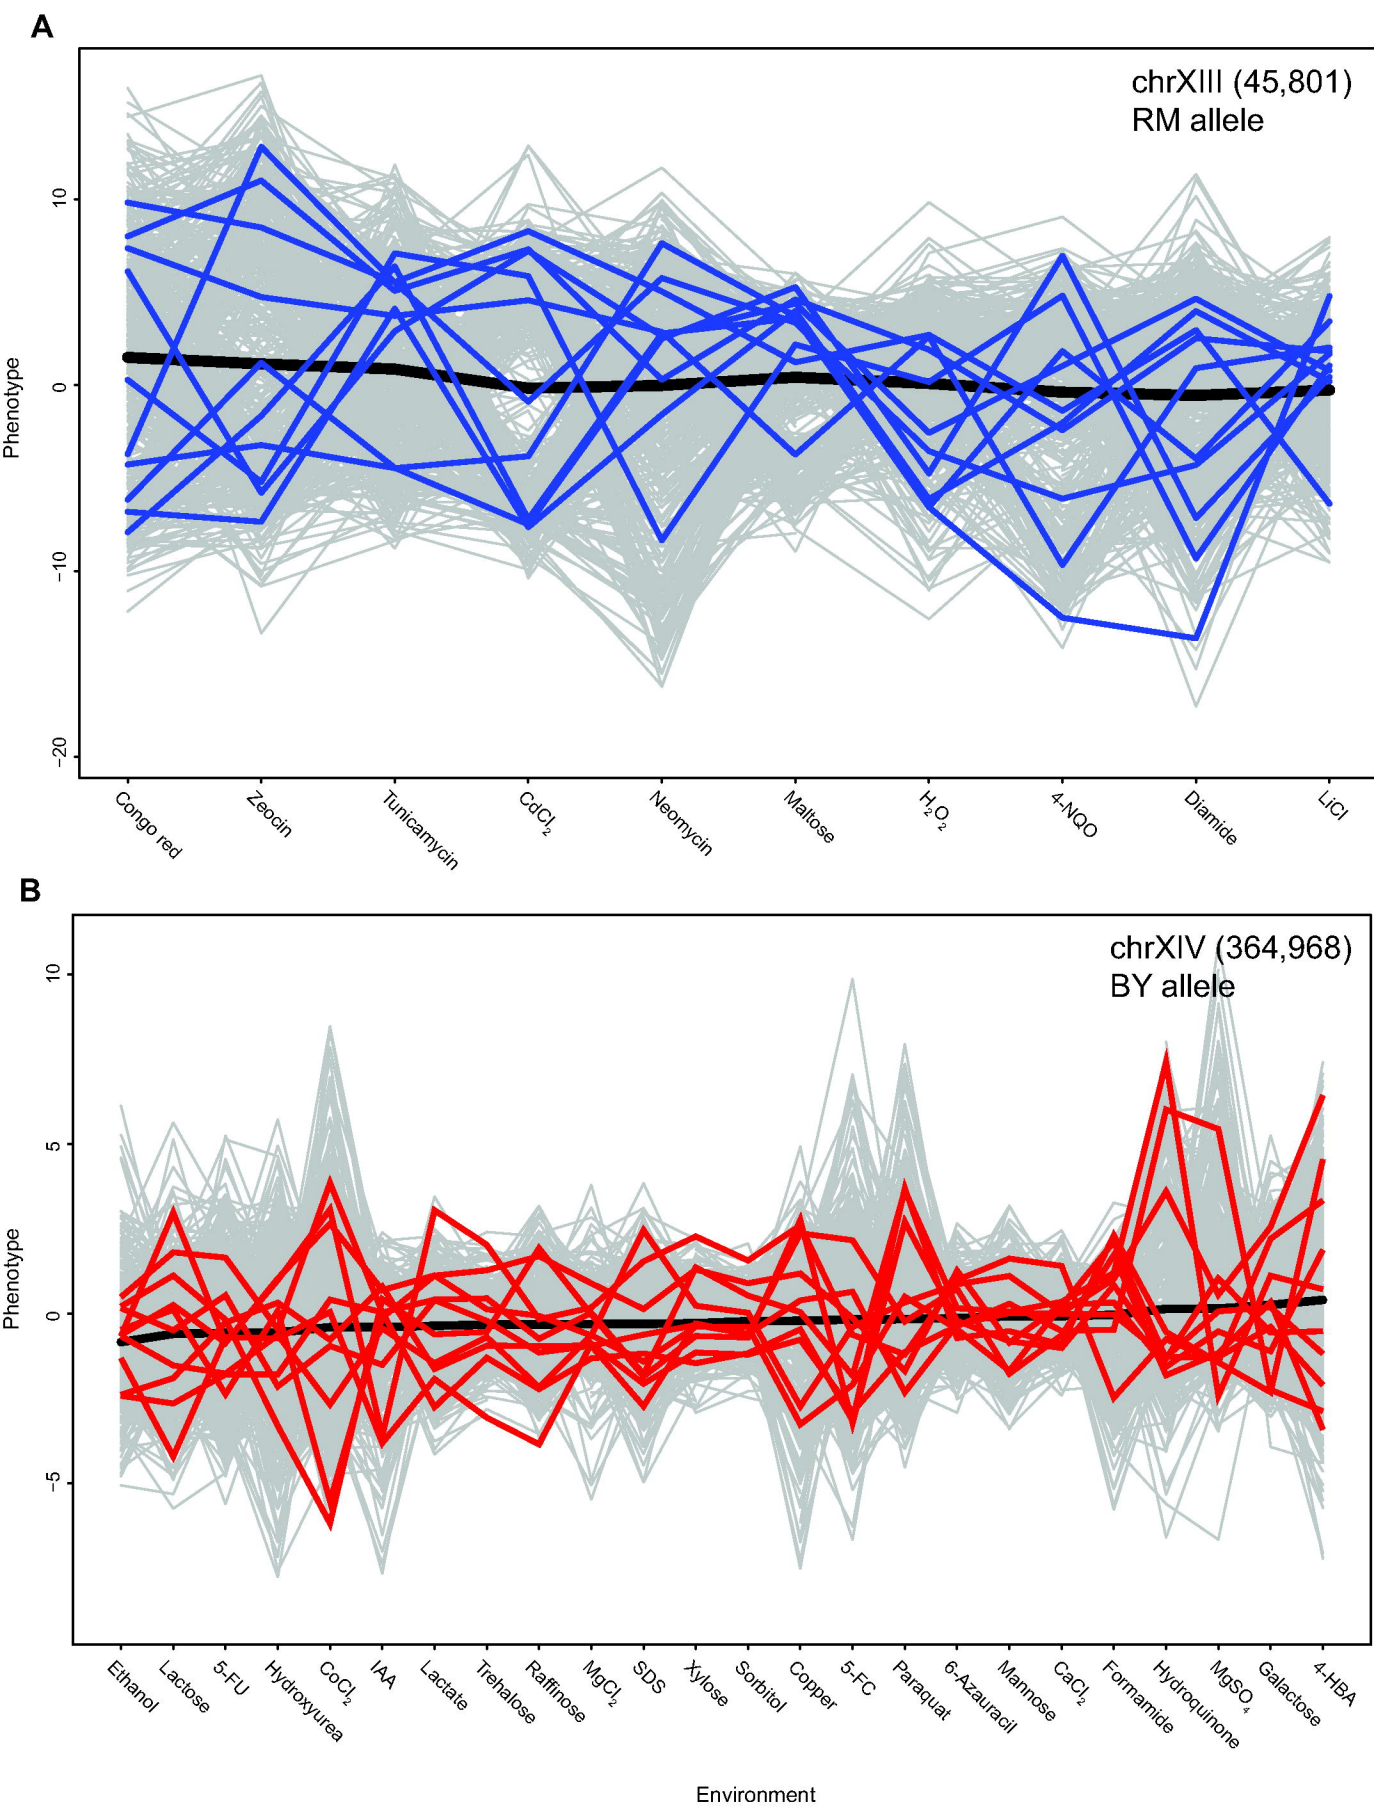

Figure 6

A

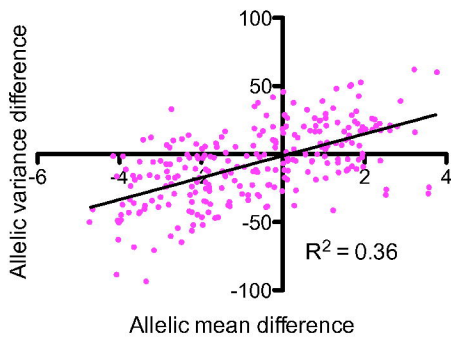

B

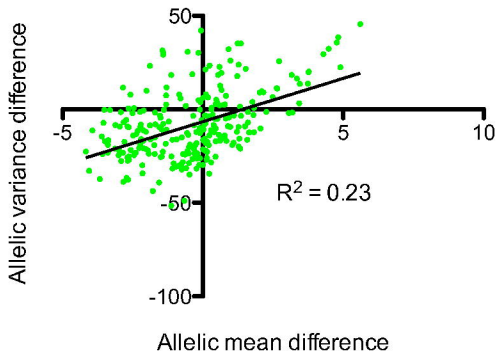

Source: http://biorxiv.org/content/10.1101/066175v1.full.pdf
